# Supplementary material for: Four MOFs with 2,2′-dimethoxy-4,4′-biphenyldicarboxylic acid: syntheses, structures, topologies and properties
Source: Royal Society of Chemistry journal article supplement (doi:10.1039/c3ce41428k), 2013-10-25
Supplement: c3ce41428k.pdf [file c3ce41428k.pdf]

# Electronic Supplementary Information

## Four MOFs with 2,2'-Dimethoxy-4,4'-biphenyldicarboxylic Acid: Syntheses, Structures, Topologies, and Properties

Rui Luo,<sup>†</sup> Heng Xu,<sup>†</sup> Hao-Xue Gu,<sup>†</sup> Xin Wang,<sup>†</sup> Yan Xu,<sup>†</sup> Xuan Shen,<sup>†</sup> Weiwei Bao,<sup>†</sup> and Dun-Ru  
Zhu<sup>\*,†,‡</sup>

<sup>†</sup>State Key Laboratory of Materials-oriented Chemical Engineering, College of Chemistry and Chemical Engineering, Nanjing University of Technology, Nanjing 210009, P. R. China, <sup>‡</sup>State Key Laboratory of Coordination Chemistry, Nanjing University, Nanjing 210093, P. R. China

**Table S1** Selected bond lengths (Å) and angles (°) for **1-4**

| <b>1</b>                               |            |                          |            |
|----------------------------------------|------------|--------------------------|------------|
| Mn1-O1 <sup>i</sup>                    | 2.123(3)   | Mn1-O4                   | 2.252(4)   |
| Mn1-O2                                 | 2.133(3)   | Mn1-O4 <sup>iv</sup>     | 2.258(4)   |
| O1 <sup>i</sup> -Mn1-O1 <sup>ii</sup>  | 95.98(12)  | O2-Mn1-O2 <sup>iii</sup> | 92.16(19)  |
| O1 <sup>i</sup> -Mn1-O2                | 178.05(15) | O2-Mn1-O4 <sup>iv</sup>  | 93.01(12)  |
| O1 <sup>i</sup> -Mn1-O2 <sup>iii</sup> | 85.92(11)  | O4-Mn1-O4 <sup>iv</sup>  | 175.79(14) |
| O1 <sup>i</sup> -Mn1-O4 <sup>iv</sup>  | 87.46(11)  | Mn1-O4-Mn1 <sup>i</sup>  | 112.57(13) |
| <b>2</b>                               |            |                          |            |
| Ni1-O4 <sup>i</sup>                    | 2.044(2)   | Ni2-O1                   | 2.002(2)   |
| Ni1-O7                                 | 2.092(2)   | Ni2-O2W                  | 2.088(2)   |
| Ni1-O1W                                | 2.110(2)   | Ni2-O1W                  | 2.109(2)   |

|                                        |           |                           |           |
|----------------------------------------|-----------|---------------------------|-----------|
| O4 <sup>i</sup> -Ni1-O7 <sup>iii</sup> | 90.48(16) | O1-Ni2-O1W                | 89.14(16) |
| O4 <sup>i</sup> -Ni1-O1W               | 87.93(16) | O1-Ni2-O2W                | 91.83(17) |
| O4 <sup>ii</sup> -Ni1-O1W              | 92.07(16) | O1-Ni2-O2W <sup>iv</sup>  | 88.16(17) |
| O7-Ni1-O1W                             | 91.03(16) | O2W-Ni2-O1W <sup>iv</sup> | 91.00(17) |

### 3

|                          |            |                                         |            |
|--------------------------|------------|-----------------------------------------|------------|
| Cu1-O1                   | 1.959(2)   | Cu1-O1W                                 | 2.120(4)   |
| Cu1-O2 <sup>iii</sup>    | 1.966(2)   | Cu1...Cu1 <sup>iii</sup>                | 2.5910(11) |
| O1-Cu1-O1 <sup>i</sup>   | 89.33(17)  | O1-Cu1-O1W                              | 95.63(14)  |
| O1-Cu1-O2 <sup>ii</sup>  | 89.80(12)  | O2 <sup>ii</sup> -Cu1-O2 <sup>iii</sup> | 88.95(15)  |
| O1-Cu1-O2 <sup>iii</sup> | 168.98(11) | O2 <sup>ii</sup> -Cu1-O1W               | 95.39(14)  |

### 4

|                         |            |                                          |            |
|-------------------------|------------|------------------------------------------|------------|
| Cd1-O1                  | 2.370(4)   | Cd2-O4 <sup>ii</sup>                     | 2.302(4)   |
| Cd1-O2                  | 2.404(4)   | Cd2-O8                                   | 2.302(4)   |
| Cd1-O3 <sup>ii</sup>    | 2.361(4)   | Cd2-O10 <sup>i</sup>                     | 2.211(3)   |
| Cd1-O4 <sup>ii</sup>    | 2.537(4)   | Cd3-O13                                  | 2.302(6)   |
| Cd1-O7                  | 2.382(4)   | Cd3-O14                                  | 2.501(7)   |
| Cd1-O8                  | 2.431(4)   | Na1-O1                                   | 2.301(5)   |
| Cd1-O9 <sup>i</sup>     | 2.181(4)   | Na1-O7                                   | 2.369(5)   |
| Cd1...Cd2               | 3.601(4)   | Cd1...Na1                                | 3.6602(5)  |
| O1-Cd1-O2               | 55.00(15)  | O4 <sup>ii</sup> -Cd2-O4 <sup>iv</sup>   | 95.88(19)  |
| O1-Cd1-O3 <sup>ii</sup> | 110.60(15) | O4 <sup>ii</sup> -Cd2-O8                 | 81.38(13)  |
| O1-Cd1-O4 <sup>ii</sup> | 163.09(14) | O4 <sup>ii</sup> -Cd2-O8 <sup>v</sup>    | 175.06(14) |
| O1-Cd1-O7               | 77.20(16)  | O4 <sup>ii</sup> -Cd2-O10 <sup>i</sup>   | 85.24(14)  |
| O1-Cd1-O8               | 118.71(14) | O4 <sup>ii</sup> -Cd2-O10 <sup>iii</sup> | 92.62(14)  |
| O1-Cd1-O9 <sup>i</sup>  | 103.96(15) | O8-Cd2-O8 <sup>v</sup>                   | 101.6(2)   |
| O2-Cd1-O3 <sup>ii</sup> | 86.80(16)  | O8-Cd2-O10 <sup>i</sup>                  | 91.25(14)  |
| O2-Cd1-O4 <sup>ii</sup> | 114.71(13) | O10 <sup>i</sup> -Cd2-O10 <sup>iii</sup> | 176.8(2)   |
| O2-Cd1-O7               | 128.91(16) | O13-Cd3-O13 <sup>vi</sup>                | 121.3(3)   |
| O2-Cd1-O8               | 166.16(14) | O13-Cd3-O13 <sup>vii</sup>               | 103.88(14) |

|                                        |            |                             |            |
|----------------------------------------|------------|-----------------------------|------------|
| O2-Cd1-O9 <sup>i</sup>                 | 85.03(15)  | O13-Cd3-O14                 | 52.3(2)    |
| O3 <sup>ii</sup> -Cd1-O4 <sup>ii</sup> | 53.05(13)  | O13-Cd3-O14 <sup>vi</sup>   | 83.0(2)    |
| O3 <sup>ii</sup> -Cd1-O7               | 95.04(18)  | O13-Cd3-O14 <sup>vi</sup>   | 152.9(2)   |
| O3 <sup>ii</sup> -Cd1-O8               | 106.99(15) | O13-Cd3-O14 <sup>viii</sup> | 81.1(2)    |
| O3 <sup>ii</sup> -Cd1-O9 <sup>i</sup>  | 130.49(17) | O14-Cd3-O14 <sup>vi</sup>   | 82.9(4)    |
| O4 <sup>ii</sup> -Cd1-O7               | 106.38(15) | O14-Cd3-O14 <sup>vii</sup>  | 124.2(2)   |
| O4 <sup>ii</sup> -Cd1-O8               | 74.30(12)  | O1-Na1-O1 <sup>ix</sup>     | 106.9(3)   |
| O7-Cd1-O8                              | 52.68(15)  | O1-Na1-O7                   | 78.81(14)  |
| O7-Cd1-O9 <sup>i</sup>                 | 127.04(19) | O1-Na1-O7 <sup>ix</sup>     | 155.13(17) |
| O8-Cd1-O9 <sup>i</sup>                 | 84.97(15)  | O7-Na1-O7 <sup>ix</sup>     | 106.5(3)   |

Symmetry codes: for **1**: i) 1.5-x, 2.5-y, 0.5+z; ii) x, 2.5-y, 0.5+z; iii) 1.5-x, y, z; iv) 1.5-x, 2.5-y, z-0.5. for **2**: i) x, y-1, z-1; ii) 1-x, 2-y, 3-z; iii) 1-x, 1-y, 2-z; iv) -x, 1-y, 2-z. for **3**: i) x-0.5, 0.5+y, z; ii) 0.5-x, 0.5-y, -z; iii) 1-x, -y, -z. for **4**: i) -x, -0.5-y, z-0.25; ii) -0.5-x, -1-y, 0.25+z; iii) x-0.5, -0.5-y, -1.5-z; iv) x, -1-y, -2-z; v) x, -0.5-y, -1.75-z; vi) -x, -y, z; vii) -x, y, -1-z; viii) x, -y, -1-z; ix) -x, -1-y, z.

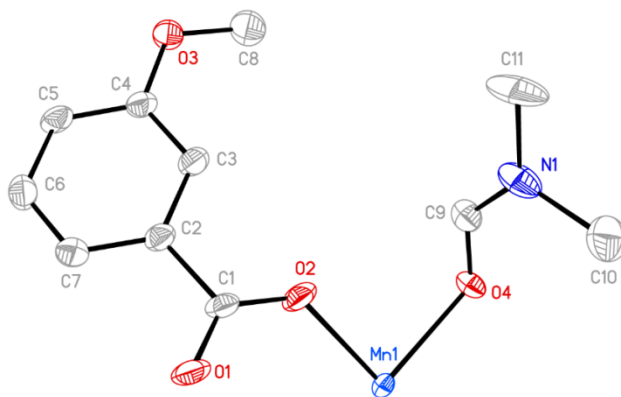

**Fig. S1** The asymmetric unit of **1** (Hydrogen atoms are omitted for clarity).

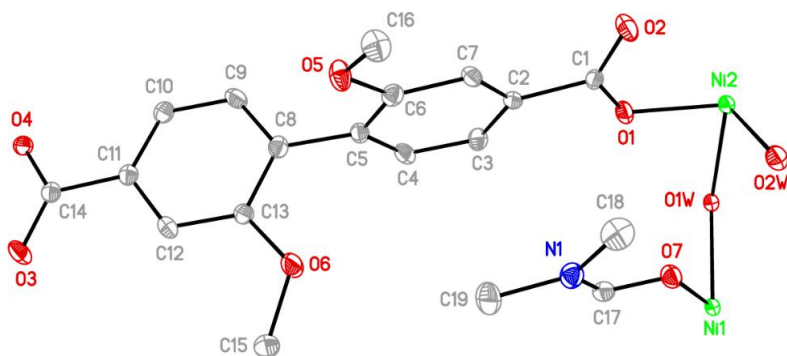

**Fig. S2** The asymmetric unit of **2** (Hydrogen atoms are omitted for clarity).

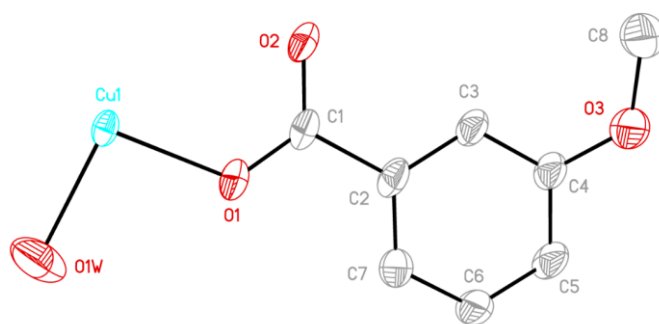

**Fig. S3** The asymmetric unit of **3** (Hydrogen atoms are omitted for clarity).

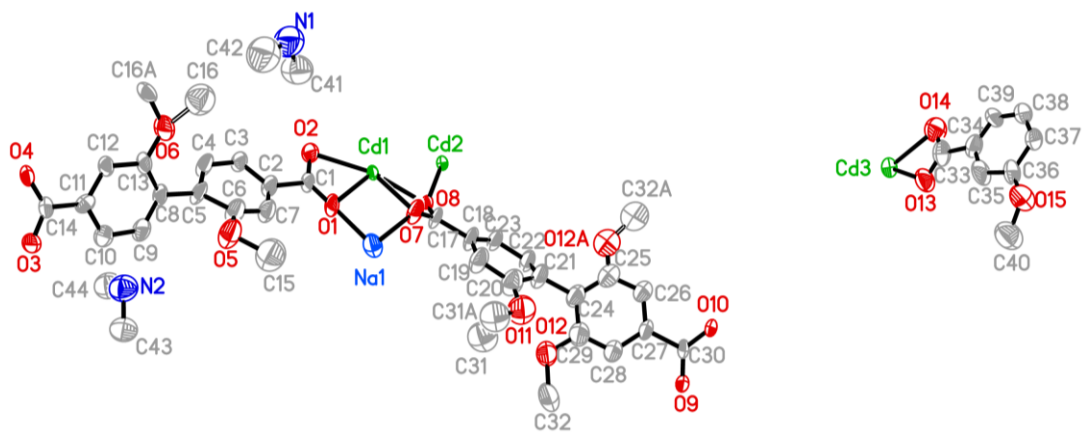

**Fig. S4** The asymmetric unit of **4** (Hydrogen atoms are omitted for clarity).

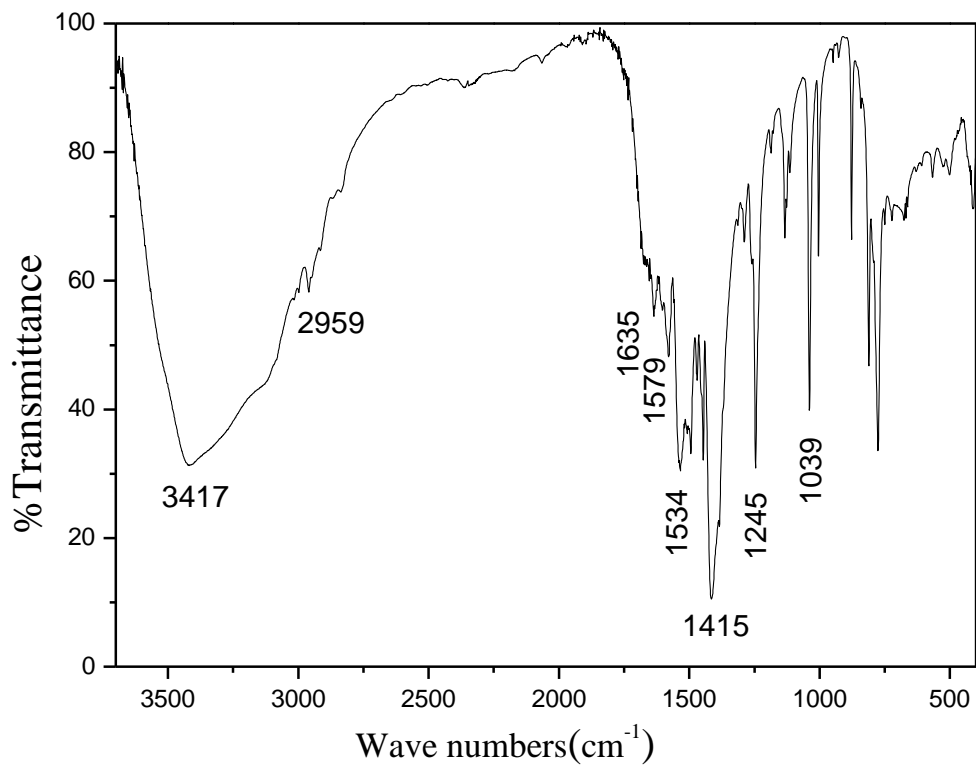

**Fig. S5** The IR spectra of **1**.

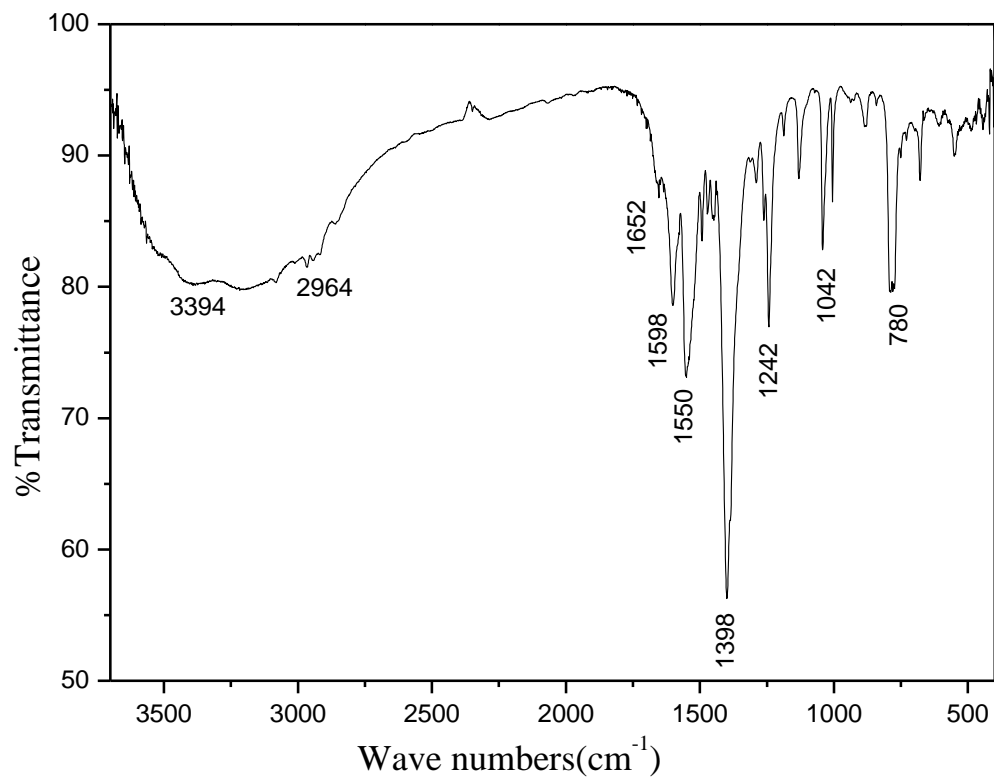

**Fig. S6** The IR spectra of **2**.

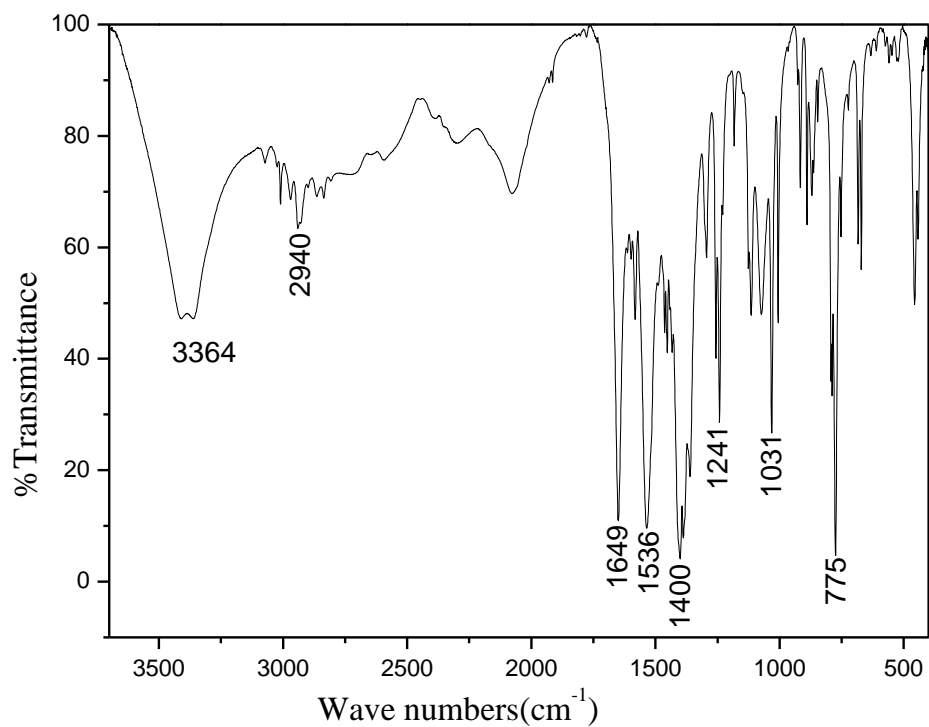

**Fig. S7** The IR spectra of **3**.

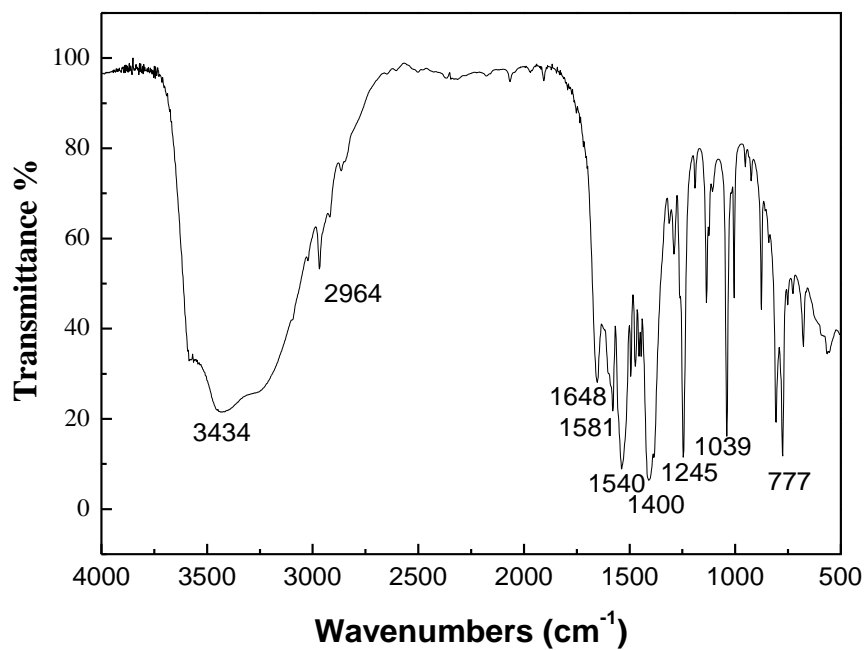

**Fig. S8** The IR spectra of **4**.

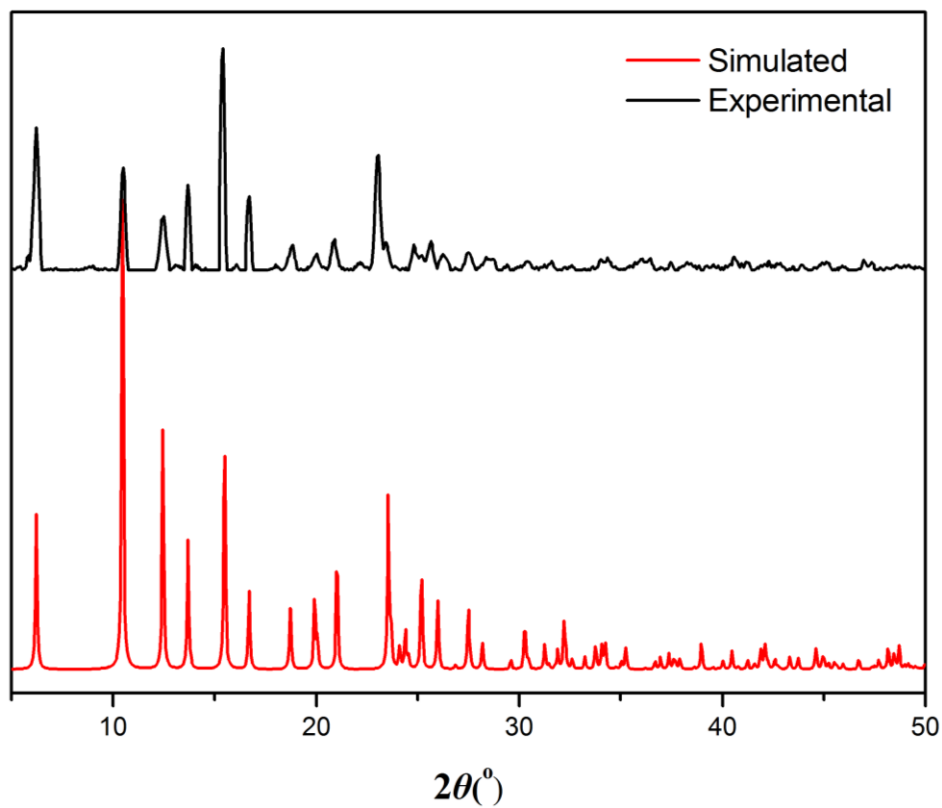

**Fig. S9** The P-XRD patterns of **1**.

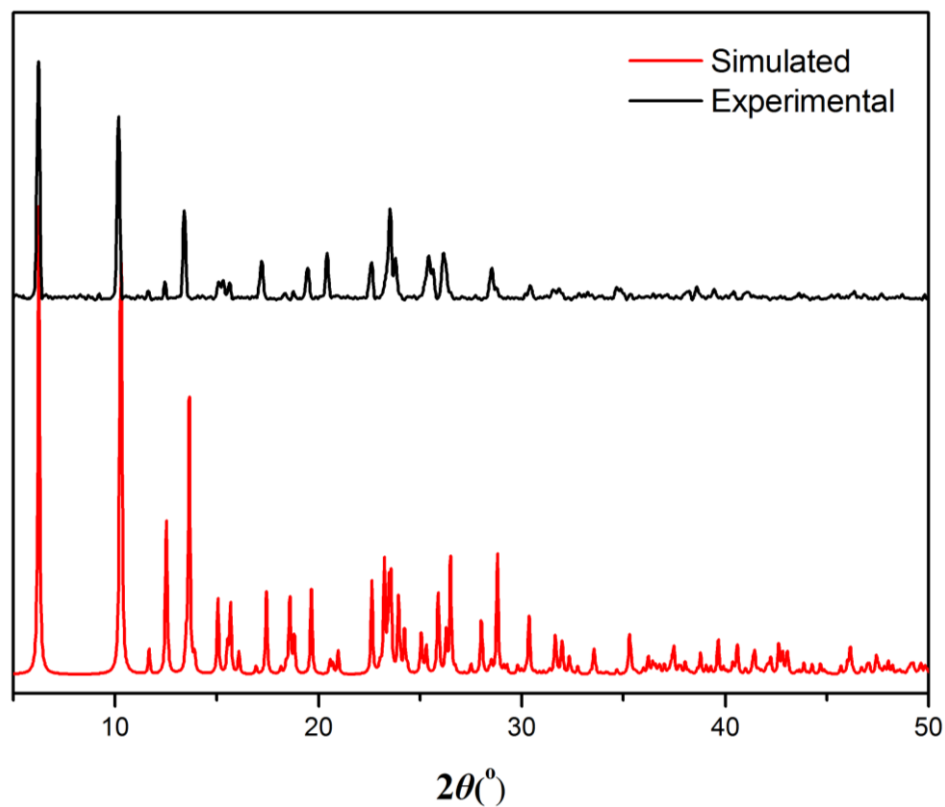

**Fig. S10** The P-XRD patterns of **2**.

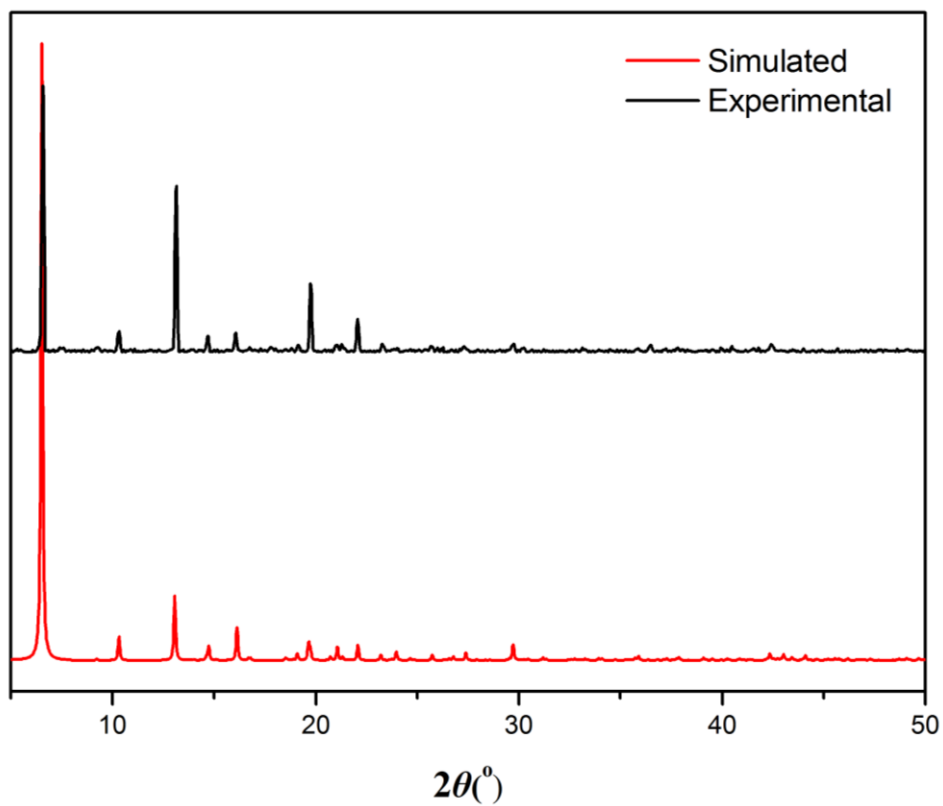

**Fig. S11** The P-XRD patterns of **3**.

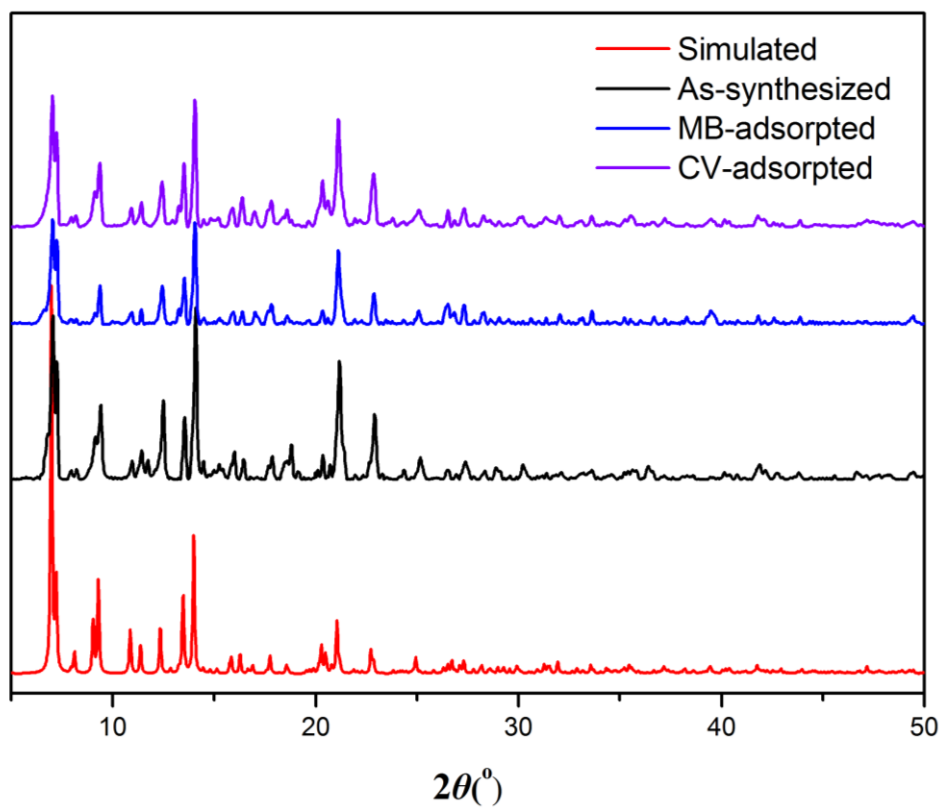

**Fig. S12** The P-XRD patterns of **4**.



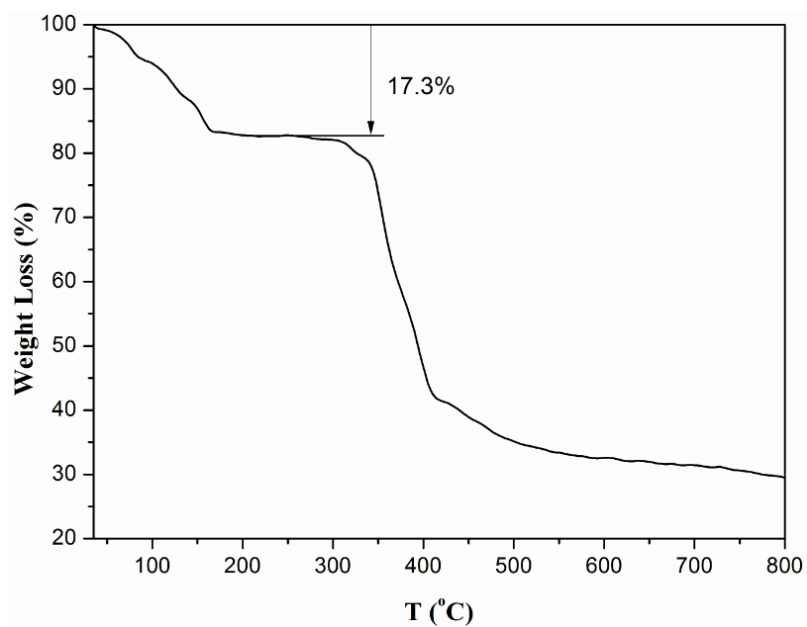

**Fig. S13** The TGA curve for **1**.

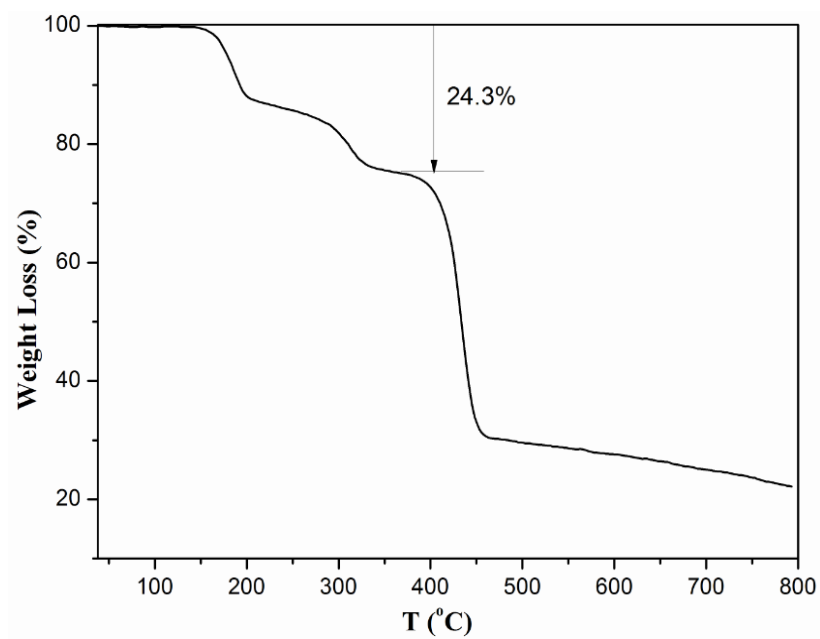

**Fig. S14** The TGA curve for **2**.

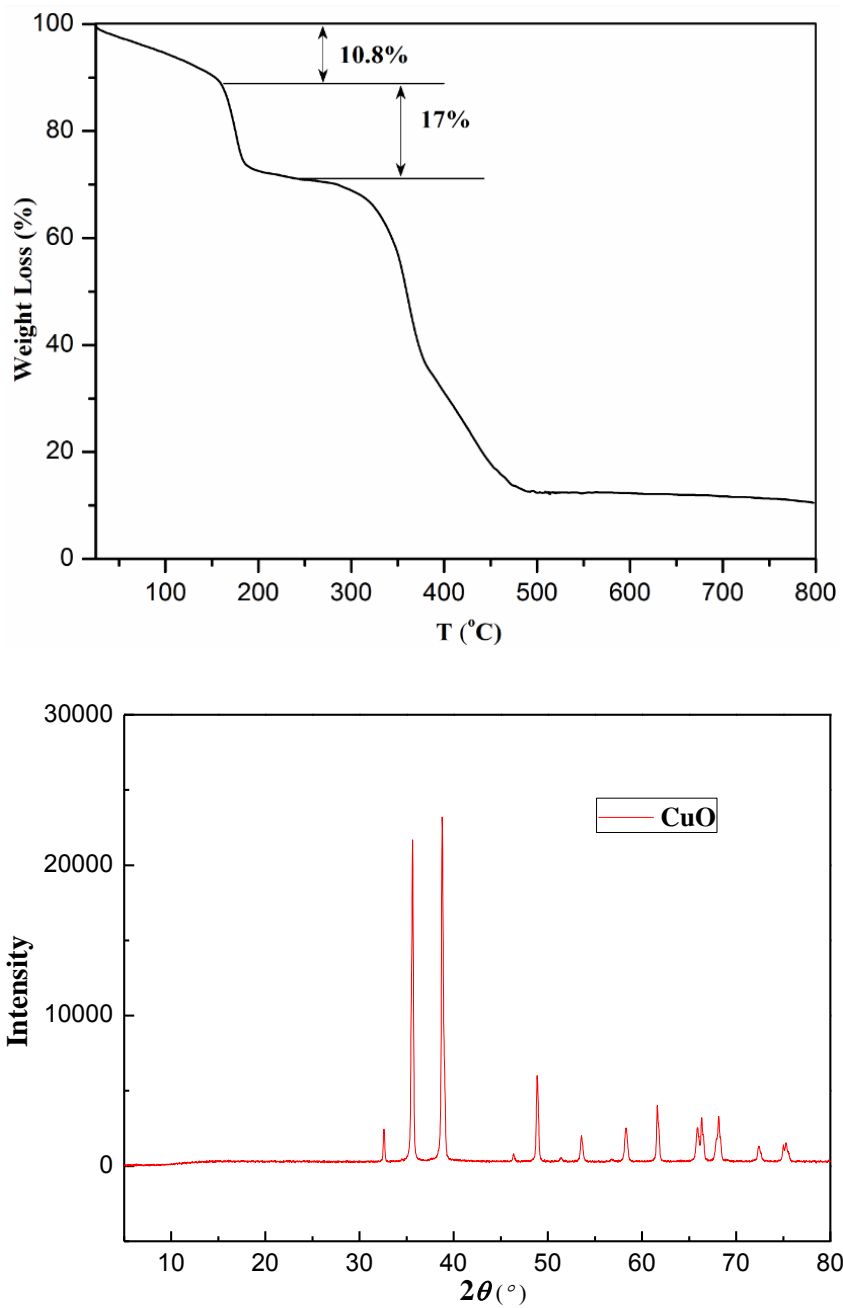

**Fig. S15** The TGA curve for **3** (top). The P-XRD patterns of the final residues (bottom).

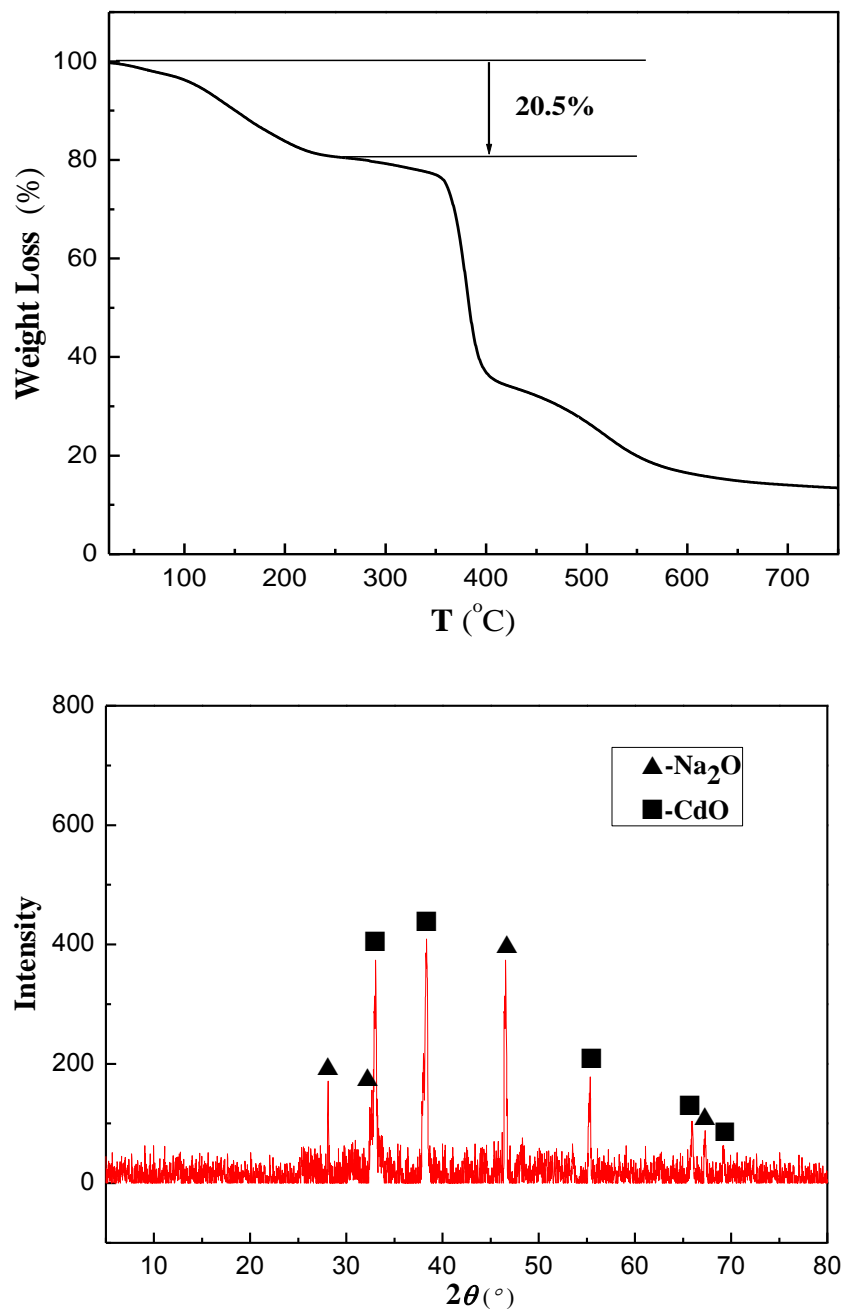

**Fig. S16** The TGA curve for **4** (top). The P-XRD patterns of the final residues (bottom).

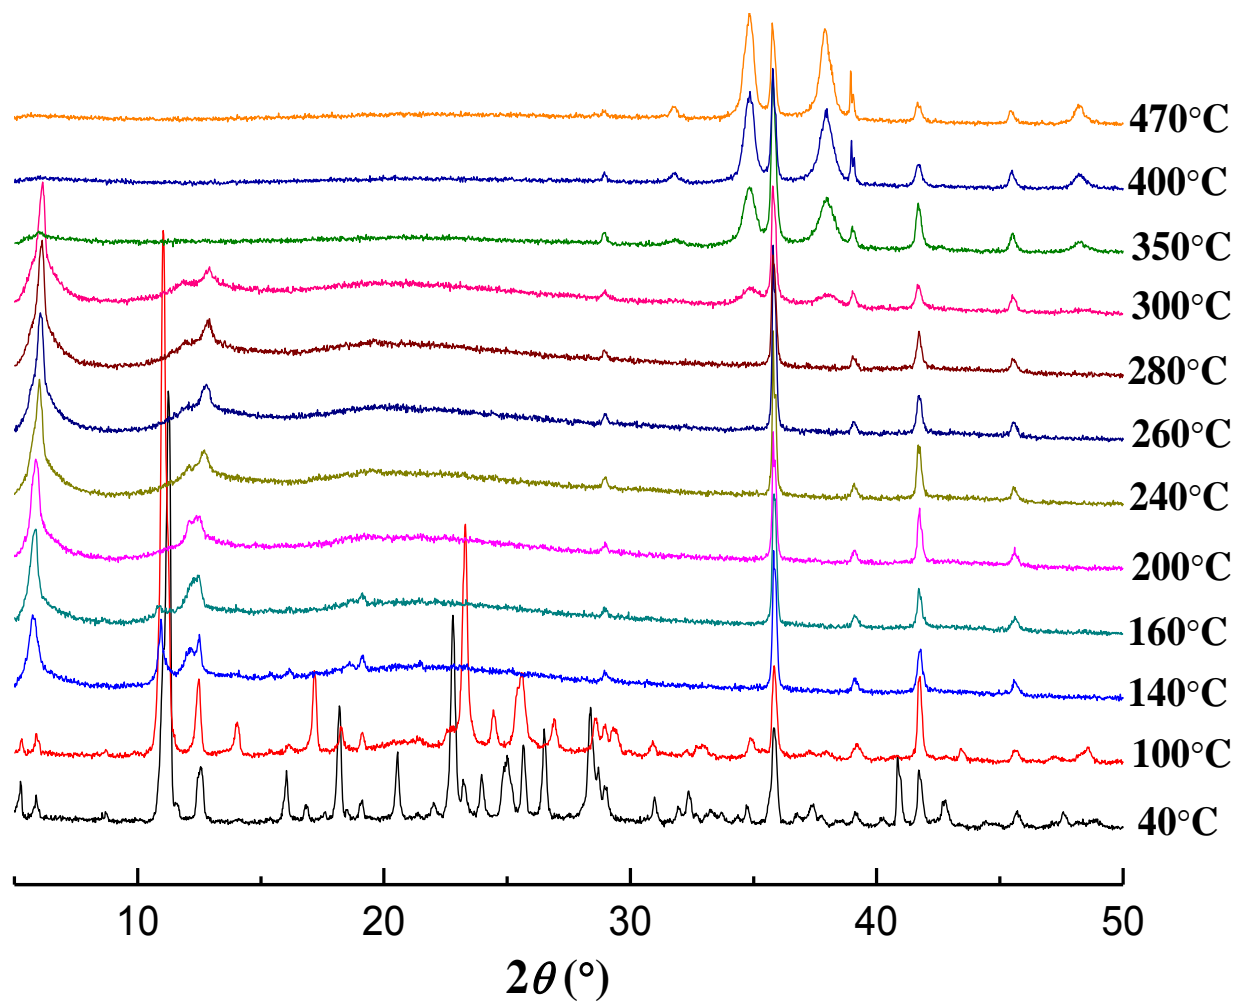

**Fig. S17** The variable temperature PXRD patterns of **3**.

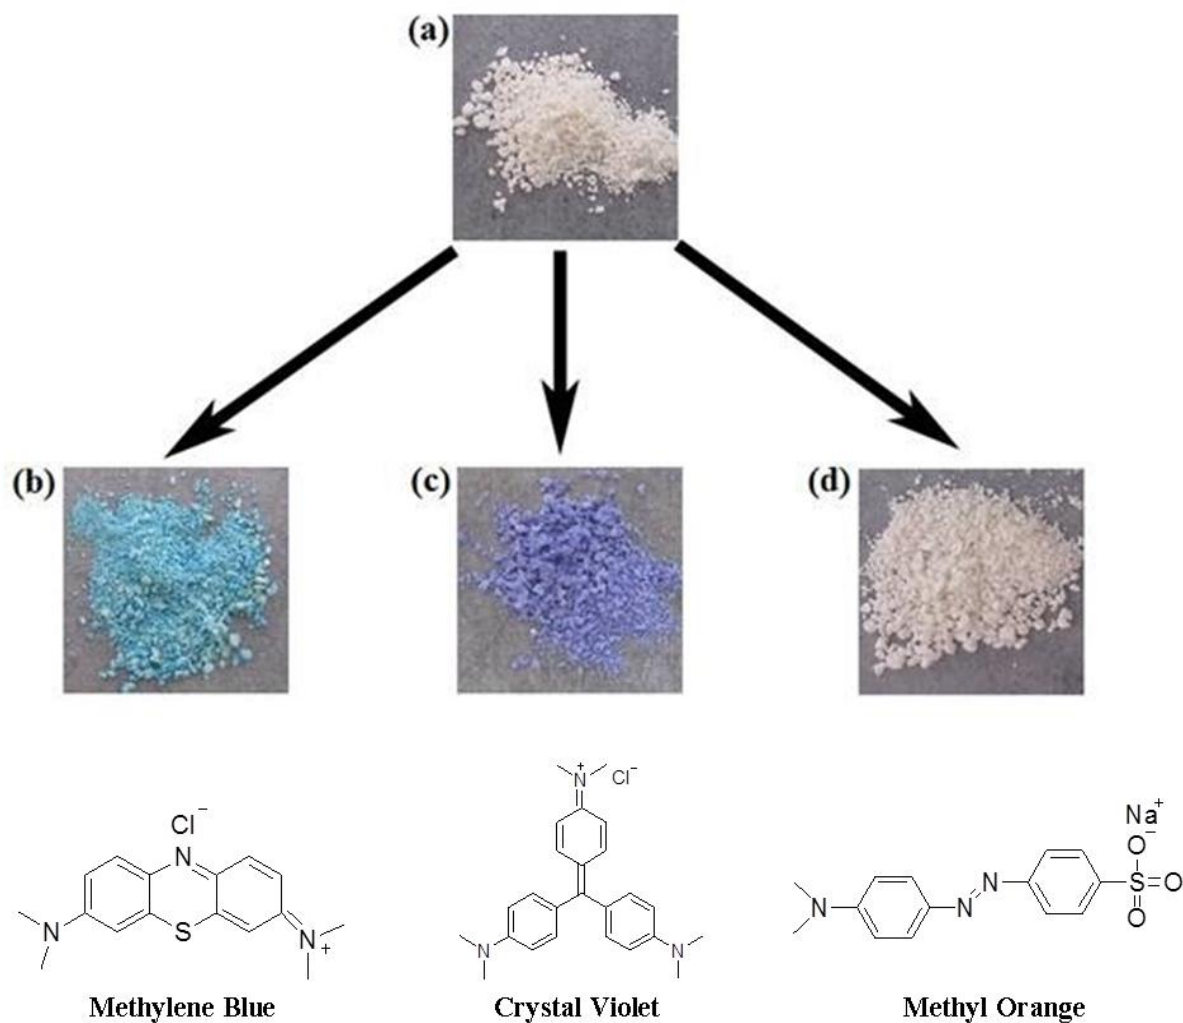

**Fig. S18** (a) As-synthesized **4**. (b)-(d) Photos of **4** after soaked in DMF solutions of three kinds of dyes.
